# Supplementary material
Source: publisher site journal article supplement (https://www.dovepress.com/article/480313)
Supplement: Supplementary file 1 [file get_supplementary_file.php]

**Supplementary**

**Table S1** Mediation model predicting Graduate Student’s Mental Health from Supervisor Narcissism

| Variables | Mental health (T3) | | | TOM (T2) | | | ROM (T2) | | | Mental health (T3) | | |
| --- | --- | --- | --- | --- | --- | --- | --- | --- | --- | --- | --- | --- |
| *β* | *SE* | *t* | *β* | *SE* | *t* | *β* | *SE* | *t* | *β* | *SE* | *t* |
| Gender | 0.423 | 0.274 | 1.542 | 0.055 | 0.089 | 0.620 | -0.170 | 0.084 | -2.028* | 0.677 | 0.258 | 2.624** |
| Age | -0.022 | 0.132 | -0.168 | -0.004 | 0.043 | -0.084 | 0.051 | 0.040 | 1.263 | -0.094 | 0.124 | -0.759 |
| ET | -0.361 | 0.270 | -1.340 | -0.088 | 0.088 | -1.006 | 0.041 | 0.082 | 0.500 | -0.449 | 0.252 | -1.781 |
| SAT | -0.072 | 0.184 | -0.391 | -0.117 | 0.060 | -1.953 | -0.108 | 0.056 | -1.918 | 0.036 | 0.172 | 0.207 |
| SN (T1) | -0.351 | 0.132 | -2.663** | -0.107 | 0.043 | -2.492* | -0.351 | 0.040 | -8.742*** | 0.096 | 0.132 | 0.730 |
| TOM (T2) |  |  |  |  |  |  |  |  |  | -0.348 | 0.151 | -2.303* |
| ROM (T2) |  |  |  |  |  |  |  |  |  | 1.380 | 0.162 | 8.547*** |
| *R2* | 0.022 | | | 0.021 | | | 0.142 | | | 0.154 | | |
| *F* | 2.465* | | | 2.338* | | | 17.854*** | | | 13.988*** | | |

**Notes:** **p* < 0.05, ***p* <0.01, ****p* <0.001.

**Abbreviations:** ET, Education type; SAT, Supervisor’s academic title; SN, Supervisor narcissism; TOM, Task-oriented mentorship; ROM, Relationship-oriented mentorship.

**Table S2** Analysis of Mediating Effect of Supervisor’s Mentorship Styles

| **Categories** | **Effect value** | **Boot SE** | **t** | **Boot LLCI** | **Boot ULCI** |
| --- | --- | --- | --- | --- | --- |
| Total effect | -0.351 | 0.132 | -2.663** | -0.609 | -0.092 |
| Direct effect | 0.171 | 0.142 | 1.200 | -0.109 | 0.449 |
| Indirect effect | -0.521 | 0.102 | - | -0.727 | -0.335 |
| TOM | 0.047 | 0.029 | - | 0.005 | 0.114 |
| ROM | -0.386 | 0.105 | - | -0.608 | -0.197 |
| SM | -0.125 | 0.078 | - | -0.295 | 0.017 |
| AM | -0.056 | 0.065 | - | -0.190 | 0.067 |

**Notes:** ***p* <0.01.

**Abbreviations:** Boot SE, boot standard error; Boot LLCI, boot confidence interval lower limit; Boot ULCI, boot confidence interval upper limit; TOM, Task-oriented mentorship; ROM, Relationship-oriented mentorship; SM, Servant mentorship; AM, Abusive mentorship.
